# Supplementary material
Source: ML conference proceedings conference paper supplement (https://openreview.net/forum?id=trxhrmeSI6)
Supplement: supplementary_material [file attachment]

# README

---

## **Supplementary Material for *Reinforcement Learning Discovers Efficient Decentralized Graph Path Search Strategies***

---

Our implementation is made publicly available at <https://github.com/flxclxc/rl-graph-search>. Please see the README.md file in this repository for instructions on how to set up the dependencies, download the publicly available data, and run the code.

If you use this code, please consider citing our work:

```
@inproceedings{pisacane24reinforcement,  
  title = {Reinforcement Learning Discovers Efficient Decentralized Graph  
Path Search Strategies},  
  author = {Pisacane, Alexei and Darvariu, Victor-Alexandru and Musolesi,  
Mirco},  
  booktitle = {Proceedings of the Third Learning on Graphs Conference (LoG  
2024)},  
  year = {2024},  
  volume = {269},  
  series = {Proceedings of Machine Learning Research},  
  publisher = {PMLR},  
}
```
